# Supplementary material for: Ganoderma lucidum bran-derived blue-emissive and green-emissive carbon dots for detection of copper ions
Source: Royal Society of Chemistry journal article supplement (doi:10.1039/d3ra02168h), 2023-01-01
Supplement: d3ra02168h1.pdf [file d3ra02168h1.pdf]

## Supporting Information

### **Ganoderma lucidum bran-derived blue-emissive and green-emissive carbon dots for detection of copper ions**

Baoying Wang<sup>1</sup>, Jingming Lan<sup>1</sup>, Junjie Ou<sup>1</sup>, Chunmiao Bo<sup>1</sup>, Bolin Gong<sup>1\*</sup>

<sup>1</sup>School of Chemistry and Chemical Engineering, Key Laboratory for Chemical Engineering and Technology, State Ethnic Affairs Commission, North Minzu University, Yinchuan, 750021, China

**\*Corresponding author.**

**Email address:** gongbl@nxu.edu.cn (B. Gong)

## Table of contents

---

### Supporting figures

**Fig. S1** UV-vis spectra of (a) BCDs and (b) GCDs S-3

**Fig. S2** Fluorescence lifetime of (a) BCDs with and (b) GCDs  
with or without  $\text{Cu}^{2+}$  S-4

---

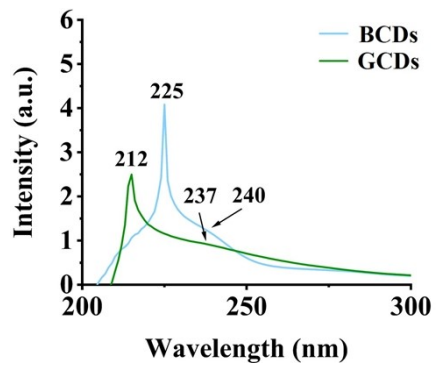

**Fig. S1** UV-vis spectra of (a) BCDs and (b) GCDs

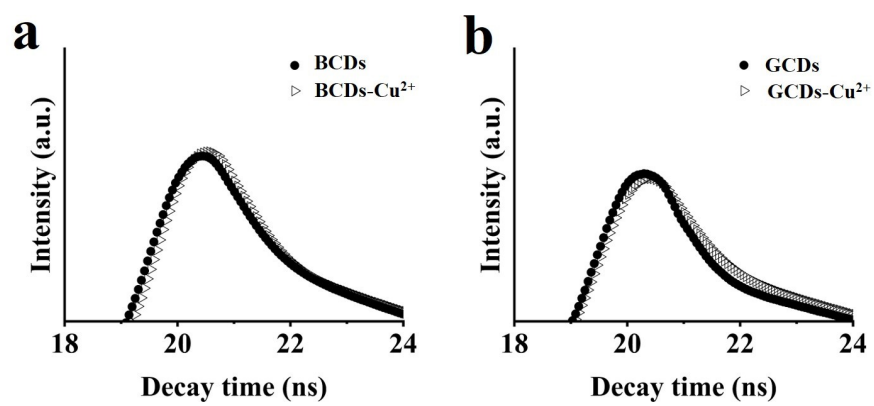

**Fig. S2** Fluorescence lifetime of (a) BCDs with and (b) GCDs with or without Cu<sup>2+</sup>
